# Supplementary material for: High Efficacy of Saliva in Detecting SARS-CoV-2 by RT-PCR in Adults and Children
Source: Microorganisms. 2021 Mar 19;9(3):642. doi: 10.3390/microorganisms9030642 (PMC8003663; doi:10.3390/microorganisms9030642)
Supplement: Supplementary file 1 [file microorganisms-09-00642-s001.xlsx]

## Sheet: Sheet_1
Ct NPS	Ct Saliva	Symptoms	Duration	Starvation	Sampling	Age	Sex
45	45	Mild	21	NA	Basic	75	M
28.3	26.7	Mild	NA	NA	Basic	51	M
45	45	Mild	2	NA	Basic	65	F
23.3	32.4	Strong	NA	NA	Basic	66	M
45	45	Mild	3	NA	Basic	25	F
45	45	Asymptomatic	NA	NA	Basic	37	M
45	45	Mild	NA	NA	Basic	67	M
45	45	Mild	NA	NA	Basic	60	M
45	45	Strong	NA	NA	Basic	57	F
45	45	Mild	3	NA	Basic	64	F
45	45	Strong	NA	NA	Basic	79	M
45	45	Asymptomatic	NA	NA	Basic	67	F
45	45	Strong	3	NA	Basic	42	F
45	45	Mild	7	NA	Basic	63	M
45	45	Strong	1	NA	Basic	78	M
45	45	Mild	7	NA	Basic	37	M
45	45	Asymptomatic	NA	NA	Basic	73	M
45	45	Mild	1	NA	Basic	29	M
45	45	Asymptomatic	NA	NA	Basic	65	M
45	45	Mild	1	NA	Basic	49	M
26.8	26.53	Mild	NA	NA	Basic	58	M
45	45	Asymptomatic	NA	NA	Basic	20	M
45	45	Mild	1	NA	Basic	19	M
45	45	Mild	2	NA	Basic	39	M
45	45	Mild	2	NA	Basic	27	M
19.53	25.86	Mild	NA	NA	Basic	41	M
23.32	29.62	Mild	5	NA	Basic	64	M
45	45	Mild	2	NA	Basic	33	M
45	45	Mild	3	NA	Basic	16	F
30.69	23.29	Mild	7	NA	Basic	38	M
45	45	Asymptomatic	NA	NA	Basic	78	M
45	45	Mild	3	NA	Basic	32	F
45	45	Asymptomatic	NA	NA	Basic	94	M
45	45	Asymptomatic	NA	NA	Basic	33	F
45	45	Asymptomatic	NA	NA	Basic	44	M
45	45	Mild	NA	NA	Basic	52	M
45	45	Asymptomatic	NA	NA	Basic	54	M
45	45	Asymptomatic	NA	NA	Basic	77	M
45	45	Asymptomatic	NA	NA	Basic	57	F
45	45	NA	NA	NA	Basic	89	M
45	45	Strong	1	NA	Basic	55	M
45	45	Mild	NA	NA	Basic	52	M
45	45	Asymptomatic	NA	NA	Basic	80	M
45	45	Asymptomatic	NA	NA	Basic	75	M
45	45	Mild	1	NA	Basic	89	F
45	45	Asymptomatic	NA	NA	Basic	39	M
45	45	Asymptomatic	NA	NA	Basic	52	M
45	45	Mild	1	NA	Basic	26	M
45	45	NA	NA	NA	Basic	31	M
45	45	Mild	1	NA	Basic	59	M
45	45	Asymptomatic	NA	NA	Basic	26	F
45	45	Mild	3	NA	Basic	34	M
21.13	23.53	Mild	2	NA	Basic	41	M
21.22	25.11	Mild	2	NA	Basic	53	M
45	45	Mild	2	NA	Basic	36	M
25.68	28.24	Mild	2	NA	Basic	15	M
24.48	31.6	Mild	2	NA	Basic	20	M
45	45	Mild	NA	NA	Basic	26	M
45	45	Asymptomatic	NA	NA	Basic	67	M
45	45	Mild	3	NA	Basic	56	M
45	45	Mild	3	NA	Basic	25	M
45	45	Asymptomatic	NA	NA	Basic	39	F
45	45	Mild	1	NA	Basic	44	F
45	45	Mild	1	NA	Basic	57	F
45	45	Mild	3	NA	Basic	37	M
45	45	Mild	5	NA	Basic	55	M
45	45	Asymptomatic	NA	NA	Basic	17	M
18.97	27.71	Mild	1	NA	Basic	53	M
19.88	27.2	Mild	1	NA	Basic	46	F
45	45	Mild	3	NA	Basic	30	F
20.15	24.72	Mild	1	NA	Basic	34	F
45	45	Mild	1	NA	Basic	26	M
30.37	38.92	Mild	2	NA	Basic	44	M
45	45	NA	NA	NA	Basic	16	F
16.37	27.15	Mild	3	NA	Basic	54	F
45	45	Mild	1	NA	Basic	22	F
21.23	31.8	Mild	NA	NA	Basic	38	M
45	45	Mild	3	NA	Basic	48	M
45	45	Mild	1	NA	Basic	44	M
45	45	Mild	1	NA	Basic	28	F
45	45	Mild	2	NA	Basic	43	F
45	45	Mild	3	NA	Basic	56	M
45	45	Mild	7	NA	Basic	22	F
15.98	31.91	NA	NA	NA	Basic	37	F
45	45	Asymptomatic	NA	NA	Basic	47	F
45	45	Mild	NA	NA	Basic	46	F
33.02	34.4	Mild	2	NA	Basic	33	F
45	45	Asymptomatic	NA	NA	Basic	26	M
26.29	27.45	Mild	1	NA	Basic	27	M
45	45	Mild	2	NA	Basic	18	F
22.08	32.24	Mild	2	NA	Basic	55	F
45	45	Mild	4	NA	Basic	54	M
45	45	Mild	2	NA	Basic	24	F
45	45	Mild	2	NA	Basic	46	F
45	45	Mild	1	NA	Basic	67	M
20.83	29.94	Mild	3	NA	Basic	44	M
45	45	Mild	3	NA	Basic	46	M
45	45	Mild	7	NA	Basic	24	F
45	45	Mild	5	NA	Basic	19	F
45	45	Mild	2	NA	Basic	28	M
45	45	Mild	1	NA	Basic	38	F
45	45	Mild	1	NA	Basic	26	M
45	45	Asymptomatic	NA	NA	Basic	25	F
45	45	Mild	2	NA	Basic	25	M
45	45	Mild	6	NA	Basic	27	M
45	45	Mild	1	NA	Basic	50	M
13.98	23.8	NA	NA	NA	Basic	30	M
45	45	Mild	NA	NA	Basic	23	M
45	45	Asymptomatic	NA	NA	Basic	22	M
45	45	Asymptomatic	NA	NA	Basic	88	M
45	45	Asymptomatic	NA	NA	Basic	90	M
45	45	Asymptomatic	NA	NA	Basic	88	F
45	45	Mild	NA	NA	Basic	74	M
22.77	18.63	Strong	3	NA	Basic	56	M
45	45	Mild	1	NA	Basic	52	M
45	45	Asymptomatic	NA	NA	Basic	71	M
45	45	Mild	1	NA	Basic	53	M
45	45	Asymptomatic	NA	NA	Basic	80	F
22.74	22.47	Mild	2	NA	Basic	43	M
29.03	33.42	Asymptomatic	NA	NA	Basic	41	F
45	45	Mild	1	NA	Basic	29	M
45	45	Mild	1	NA	Basic	29	M
25.8	29.76	Mild	5	NA	Basic	21	F
19.45	30.76	Mild	4	NA	Basic	73	M
45	45	Mild	3	NA	Basic	15	M
45	45	Mild	1	NA	Basic	24	M
45	45	Mild	3	NA	Basic	34	M
45	45	Mild	2	NA	Basic	16	F
27.08	18.86	Mild	NA	NA	Basic	32	F
45	45	Mild	NA	NA	Basic	33	M
45	45	Mild	2	NA	Basic	61	F
45	45	Mild	2	NA	Basic	33	F
45	45	Asymptomatic	NA	NA	Basic	27	F
45	45	Asymptomatic	NA	NA	Basic	36	M
45	45	Mild	NA	NA	Basic	72	M
45	45	Asymptomatic	NA	NA	Basic	61	M
32.21	33.04	Mild	1	NA	Basic	48	F
23.13	26.89	Mild	2	NA	Basic	28	F
45	45	Asymptomatic	NA	NA	Basic	36	M
45	45	Mild	2	NA	Basic	51	F
26.18	32.9	Mild	3	NA	Basic	30	F
21.42	32.53	Mild	3	NA	Basic	47	F
45	45	Mild	3	NA	Basic	51	F
18.66	28.02	Mild	NA	NA	Basic	39	M
25.67	23.81	Mild	3	NA	Basic	37	F
45	45	Mild	1	NA	Basic	27	F
45	45	Asymptomatic	NA	NA	Basic	56	F
45	45	Mild	11	NA	Basic	30	F
45	45	Asymptomatic	NA	NA	Basic	43	M
45	45	Mild	2	NA	Basic	78	M
45	45	Mild	4	NA	Basic	17	M
45	45	Asymptomatic	NA	NA	Basic	55	M
45	45	Mild	1	NA	Basic	18	M
21.12	33.32	Asymptomatic	NA	NA	Basic	28	F
45	45	Mild	1	NA	Basic	38	F
45	45	NA	NA	NA	Basic	75	M
45	45	NA	NA	NA	Basic	32	F
19.83	25.64	Mild	2	NA	Basic	58	M
45	45	Asymptomatic	NA	NA	Basic	47	M
45	45	Mild	3	NA	Basic	30	F
18.91	27.54	Asymptomatic	NA	NA	Basic	71	M
45	45	Asymptomatic	NA	NA	Basic	59	M
45	45	Mild	2	NA	Basic	60	M
23.25	22.88	Mild	1	NA	Basic	51	M
23.1	31.3	Mild	1	NA	Basic	19	M
45	45	Mild	1	NA	Basic	19	F
45	45	Asymptomatic	NA	NA	Basic	25	F
45	45	Mild	2	NA	Basic	16	F
45	45	Asymptomatic	NA	NA	Basic	24	M
45	45	Mild	1	NA	Basic	20	F
45	45	Mild	2	NA	Basic	17	M
45	45	Mild	1	NA	Basic	31	F
45	45	Mild	2	NA	Basic	38	M
45	45	Mild	4	NA	Basic	32	M
22.01	30.06	Mild	6	NA	Basic	53	M
45	45	Asymptomatic	NA	NA	Basic	46	M
45	45	Mild	1	NA	Basic	26	M
45	45	NA	2	NA	Basic	13	M
17.25	33.96	Mild	1	NA	Basic	27	F
45	45	Mild	3	NA	Basic	22	M
45	45	Mild	2	NA	Basic	33	M
45	45	Mild	4	NA	Basic	35	F
18.38	19.5	Mild	1	NA	Basic	45	M
45	45	Mild	1	NA	Basic	50	F
45	45	Mild	4	NA	Basic	41	M
45	45	Mild	3	NA	Basic	54	F
45	45	Mild	1	NA	Basic	20	F
45	45	Mild	3	NA	Basic	28	F
45	45	Mild	1	NA	Basic	53	M
45	45	Mild	6	NA	Basic	25	F
31.94	26.14	Mild	2	NA	Basic	48	F
25.34	33.14	Mild	3	NA	Basic	37	F
45	45	Mild	2	NA	Basic	25	M
45	45	Asymptomatic	NA	NA	Basic	31	M
45	45	Mild	2	NA	Basic	27	F
45	45	Mild	1	NA	Basic	29	F
45	45	Mild	2	NA	Basic	30	M
45	45	Mild	2	NA	Basic	43	F
32.02	30.56	Mild	1	NA	Basic	31	M
23.66	33.93	Mild	2	NA	Basic	48	F
45	45	Asymptomatic	NA	NA	Basic	23	M
45	45	Strong	4	NA	Basic	63	M
45	45	Asymptomatic	NA	NA	Basic	28	M
45	45	NA	NA	NA	Basic	18	F
27.79	29.01	Mild	3	NA	Basic	49	F
45	45	Asymptomatic	NA	NA	Basic	55	M
45	45	Asymptomatic	NA	NA	Basic	51	M
45	45	Asymptomatic	NA	NA	Basic	83	M
45	45	Mild	NA	NA	Basic	21	F
19.99	18.46	Strong	2	NA	Basic	25	M
45	45	Asymptomatic	NA	NA	Basic	75	M
45	45	Mild	1	NA	Basic	83	M
45	45	Asymptomatic	NA	NA	Basic	42	F
45	45	NA	NA	NA	Basic	67	F
45	45	Mild	NA	NA	Basic	34	F
45	45	Asymptomatic	NA	NA	Basic	65	F
45	45	Mild	NA	NA	Basic	47	M
22.75	19.77	Mild	2	NA	Basic	52	M
45	45	Mild	2	NA	Basic	25	F
26.01	22.97	Mild	4	NA	Basic	11	M
20.61	18.55	Mild	1	NA	Basic	24	F
45	45	Mild	3	NA	Basic	48	M
45	45	Asymptomatic	NA	NA	Basic	18	F
24.23	29.61	Mild	1	NA	Basic	13	M
45	45	Asymptomatic	NA	NA	Basic	27	M
45	45	Asymptomatic	NA	NA	Basic	71	M
45	45	Mild	7	NA	Basic	39	M
22.2	29.46	Mild	5	NA	Basic	18	M
45	45	Asymptomatic	NA	NA	Basic	18	M
45	45	Asymptomatic	NA	NA	Basic	19	M
18.29	29.03	Mild	2	NA	Basic	53	M
24.44	35.7	Mild	7	NA	Basic	51	F
35.42	33.45	Mild	2	NA	Basic	25	F
45	45	Asymptomatic	NA	NA	Basic	23	M
45	45	Mild	1	NA	Basic	26	F
45	45	Asymptomatic	NA	NA	Basic	68	F
45	45	Mild	1	NA	Basic	30	F
45	45	Mild	3	NA	Basic	18	M
45	45	Asymptomatic	NA	NA	Basic	26	M
45	45	Mild	2	NA	Basic	29	M
18.03	26.29	Mild	2	NA	Basic	42	F
45	45	Asymptomatic	NA	NA	Basic	30	F
45	45	Asymptomatic	NA	NA	Basic	48	F
45	45	Asymptomatic	NA	NA	Basic	17	M
45	45	Mild	2	NA	Basic	38	M
45	45	Mild	2	NA	Basic	23	M
45	45	Mild	3	NA	Basic	19	M
45	45	Asymptomatic	NA	NA	Basic	80	F
45	45	Mild	2	NA	Basic	24	M
45	45	Mild	2	NA	Basic	36	M
45	45	Asymptomatic	NA	NA	Basic	63	F
45	45	Mild	3	NA	Basic	37	M
45	45	Asymptomatic	NA	NA	Basic	66	M
45	45	Asymptomatic	NA	NA	Basic	28	F
45	45	Mild	2	NA	Basic	53	F
45	45	Asymptomatic	NA	NA	Basic	53	F
20.34	21.88	Mild	NA	NA	Basic	15	F
45	45	Asymptomatic	NA	NA	Basic	18	F
45	45	NA	NA	NA	Basic	42	F
45	45	Mild	10	NA	Basic	57	F
45	45	Asymptomatic	NA	NA	Basic	58	F
45	45	Mild	7	NA	Basic	46	F
24.7	33.25	Mild	5	NA	Basic	33	F
45	45	Mild	1	NA	Basic	23	F
45	45	Asymptomatic	NA	NA	Basic	22	F
45	45	Mild	2	NA	Basic	20	F
45	45	Asymptomatic	NA	NA	Basic	44	M
24.22	27.11	Mild	2	NA	Basic	48	M
45	45	Mild	3	NA	Basic	25	M
22.88	32.39	Mild	3	NA	Basic	33	M
18.8	18.82	Mild	NA	NA	Basic	60	M
45	45	Mild	2	NA	Basic	34	F
45	45	Asymptomatic	NA	NA	Basic	27	M
45	45	Mild	3	NA	Basic	15	F
45	45	Mild	NA	NA	Basic	20	F
45	45	Asymptomatic	NA	NA	Basic	50	M
45	45	Mild	3	NA	Basic	56	F
45	45	Asymptomatic	NA	NA	Basic	48	M
45	45	Asymptomatic	NA	NA	Basic	83	F
45	45	Mild	1	NA	Basic	26	F
45	45	Asymptomatic	NA	NA	Basic	74	M
45	45	Asymptomatic	NA	NA	Basic	64	M
34.84	32.07	Strong	15	NA	Basic	71	F
45	45	Asymptomatic	NA	NA	Basic	57	F
45	45	Mild	4	NA	Basic	18	F
33.63	33.73	Mild	2	NA	Basic	51	M
45	45	Asymptomatic	NA	NA	Basic	50	F
45	45	Mild	2	NA	Basic	55	M
45	45	Mild	1	NA	Basic	32	F
45	45	Mild	1	NA	Basic	21	F
45	45	Mild	2	NA	Basic	38	M
22.37	25.05	Mild	2	NA	Basic	33	F
45	45	Mild	3	NA	Basic	44	F
45	45	Mild	1	NA	Basic	28	M
45	45	Asymptomatic	NA	NA	Basic	51	F
45	45	Asymptomatic	NA	NA	Basic	34	M
45	45	Mild	NA	NA	Basic	48	M
45	45	Mild	2	NA	Basic	16	F
22.61	28.02	Mild	1	NA	Basic	52	F
45	45	Mild	3	NA	Basic	28	F
45	45	Mild	3	NA	Basic	28	F
45	45	Mild	1	NA	Basic	29	M
45	45	Mild	1	NA	Basic	16	M
45	45	Asymptomatic	NA	NA	Basic	55	M
45	45	Asymptomatic	NA	NA	Basic	55	M
45	45	Asymptomatic	NA	NA	Basic	29	F
45	45	Mild	3	NA	Basic	64	M
45	45	Mild	1	NA	Basic	51	F
45	45	Mild	2	NA	Basic	16	M
45	45	Asymptomatic	NA	NA	Basic	52	M
28.69	35.8	Strong	13	NA	Basic	28	M
45	45	Mild	NA	NA	Basic	17	F
45	45	Asymptomatic	NA	NA	Basic	49	M
45	45	Mild	NA	NA	Basic	36	F
45	45	Asymptomatic	NA	NA	Basic	39	M
17.37	22.61	Asymptomatic	NA	NA	Basic	73	F
45	45	Asymptomatic	NA	NA	Basic	86	M
45	45	NA	NA	NA	Basic	77	M
45	45	Mild	NA	NA	Basic	59	M
45	45	Asymptomatic	NA	NA	Basic	44	M
45	45	NA	NA	NA	Basic	86	M
45	45	Strong	3	NA	Basic	56	M
45	45	Asymptomatic	NA	NA	Basic	70	F
45	45	Asymptomatic	NA	NA	Basic	62	F
45	45	Asymptomatic	NA	NA	Basic	68	M
45	45	Asymptomatic	NA	NA	Basic	44	M
45	45	Asymptomatic	NA	NA	Basic	23	F
21.83	31.75	Mild	NA	NA	Basic	59	F
18.06	15.32	Mild	1	NA	Basic	30	M
45	45	Mild	2	NA	Basic	44	M
45	45	Asymptomatic	NA	NA	Basic	56	M
45	45	NA	5	NA	Basic	30	F
45	45	Mild	1	NA	Basic	17	F
20.44	27.54	Mild	2	NA	Basic	46	F
45	45	Mild	5	NA	Basic	24	M
45	45	Asymptomatic	NA	NA	Basic	33	F
45	45	Mild	2	NA	Basic	13	M
45	45	Mild	1	NA	Basic	41	M
45	45	Mild	1	NA	Basic	37	F
45	45	Mild	3	NA	Basic	51	F
45	45	Mild	3	NA	Basic	23	F
24.63	20.02	Mild	1	NA	Basic	52	F
45	45	Asymptomatic	NA	NA	Basic	51	M
45	45	Mild	3	NA	Basic	18	M
45	45	Mild	7	NA	Basic	19	F
28.1	29.86	Mild	3	NA	Basic	44	M
19.13	28.2	Mild	2	NA	Basic	18	F
45	45	Mild	5	NA	Basic	27	M
45	45	Mild	1	NA	Basic	56	M
45	45	Asymptomatic	NA	NA	Basic	36	M
27.39	33.72	Mild	1	NA	Basic	46	F
16.74	19.68	Mild	3	NA	Basic	27	M
45	45	Asymptomatic	NA	NA	Basic	23	M
45	45	Mild	2	NA	Basic	47	M
45	45	Asymptomatic	NA	NA	Basic	17	F
21.01	28.18	Mild	2	NA	Basic	23	M
45	45	Mild	5	NA	Basic	30	F
45	45	Asymptomatic	NA	NA	Basic	41	M
45	45	Mild	5	NA	Basic	37	M
18.15	28.22	NA	3	NA	Basic	65	F
45	45	Mild	3	NA	Basic	24	M
45	45	Mild	1	NA	Basic	43	F
45	45	Mild	7	NA	Basic	55	F
26.12	22.65	Mild	1	NA	Basic	20	F
23.46	24.82	Mild	2	NA	Basic	66	F
45	45	Mild	1	NA	Basic	18	M
45	45	Mild	1	NA	Basic	27	M
25.81	31.87	Mild	3	NA	Basic	32	F
22.05	21.63	Mild	2	NA	Basic	66	F
45	45	Mild	1	NA	Basic	35	F
45	45	Mild	2	NA	Basic	49	F
45	45	Mild	1	NA	Basic	30	F
45	45	Mild	NA	NA	Basic	49	F
45	45	Mild	1	NA	Basic	38	M
45	45	Mild	5	NA	Basic	42	M
45	45	Mild	2	NA	Basic	23	F
45	45	Mild	3	NA	Basic	18	F
45	45	Asymptomatic	NA	NA	Basic	42	F
45	45	Mild	2	NA	Basic	26	F
45	45	Mild	2	NA	Basic	13	M
22.89	32.15	Mild	2	NA	Basic	35	M
45	45	Mild	1	NA	Basic	47	M
29.71	34.01	Mild	1	NA	Basic	17	F
45	45	Mild	6	NA	Basic	15	F
45	45	Mild	2	NA	Basic	31	M
45	45	Mild	2	NA	Basic	61	M
34.97	33.53	Asymptomatic	NA	NA	Basic	51	M
45	45	Asymptomatic	NA	NA	Basic	54	F
20.21	27.8	Mild	1	NA	Basic	40	F
29.84	23.89	Mild	4	NA	Basic	37	M
45	45	Mild	7	NA	Basic	12	F
45	45	Asymptomatic	NA	NA	Basic	28	M
45	45	Mild	2	NA	Basic	43	M
45	45	Mild	2	NA	Basic	30	M
45	45	Mild	2	NA	Basic	42	F
33.52	31.88	Asymptomatic	NA	NA	Basic	18	F
45	45	Asymptomatic	NA	NA	Basic	31	F
45	45	Mild	3	NA	Basic	81	M
22.71	25.05	Mild	7	NA	Basic	42	M
28.38	32.13	Mild	10	NA	Basic	19	F
45	45	Mild	8	NA	Basic	38	M
45	45	Asymptomatic	NA	NA	Basic	36	M
28.88	31.69	Mild	1	NA	Basic	28	F
45	45	Mild	2	NA	Basic	38	F
45	45	Asymptomatic	NA	NA	Basic	76	F
31.23	32.39	Mild	1	NA	Basic	27	F
45	45	Mild	3	NA	Basic	65	F
45	45	Mild	2	NA	Basic	64	F
45	45	NA	NA	NA	Basic	46	F
45	45	Mild	1	NA	Basic	70	M
39.05	33.96	Asymptomatic	NA	NA	Basic	56	M
45	45	Strong	3	NA	Basic	70	M
25.73	35.22	Asymptomatic	NA	NA	Basic	18	F
45	45	Mild	NA	NA	Basic	46	F
45	45	Asymptomatic	NA	NA	Basic	60	M
45	45	Mild	NA	NA	Basic	63	M
45	45	Mild	NA	NA	Basic	69	M
45	45	Asymptomatic	NA	NA	Basic	86	M
35.74	37.98	Strong	10	NA	Basic	43	M
45	45	Asymptomatic	NA	NA	Basic	70	F
45	45	NA	NA	NA	Basic	43	M
45	45	Strong	30	NA	Basic	50	M
28.11	26.31	NA	NA	NA	Basic	66	F
34.85	35.43	Mild	7	NA	Basic	70	M
45	45	Asymptomatic	NA	NA	Basic	47	F
21.7	29.9	Mild	1	NA	Basic	50	M
45	45	Mild	4	NA	Basic	47	M
45	45	Mild	3	NA	Basic	21	F
45	45	Mild	2	NA	Basic	62	F
45	45	Mild	4	NA	Basic	34	F
45	45	Mild	3	NA	Basic	55	M
45	45	Asymptomatic	NA	NA	Basic	70	F
45	45	Mild	7	NA	Basic	48	F
22.53	35.62	Mild	2	NA	Basic	46	F
45	45	Mild	2	NA	Basic	21	M
45	45	Mild	14	NA	Basic	19	F
45	45	Mild	1	NA	Basic	33	F
45	45	Mild	10	NA	Basic	47	F
25.28	33.23	Mild	7	NA	Basic	57	M
45	45	Mild	3	NA	Basic	23	F
45	45	Mild	6	NA	Basic	33	M
45	45	Mild	4	NA	Basic	40	M
45	45	Asymptomatic	NA	NA	Basic	35	M
45	45	Mild	1	NA	Basic	19	F
45	45	Mild	4	NA	Basic	33	M
45	45	Asymptomatic	NA	NA	Basic	39	F
23.08	34.74	Mild	2	NA	Basic	54	M
45	45	Mild	2	NA	Basic	40	F
45	45	Asymptomatic	NA	NA	Basic	40	F
45	45	Mild	2	NA	Basic	35	M
45	45	Mild	2	NA	Basic	26	M
45	45	Mild	2	NA	Basic	13	F
24.57	25.42	Mild	3	NA	Basic	46	F
45	45	Mild	3	NA	Basic	45	F
35.31	33.32	Asymptomatic	NA	NA	Basic	66	M
23.7	32.93	Mild	2	NA	Basic	31	F
45	45	Mild	4	NA	Basic	19	F
45	45	Mild	2	NA	Basic	54	M
29.26	30.41	Mild	3	NA	Basic	43	M
21.34	26.2	Mild	2	NA	Basic	13	F
45	45	Mild	2	NA	Basic	58	F
45	45	Mild	1	NA	Basic	13	M
45	45	Mild	5	NA	Basic	28	F
45	45	Mild	4	NA	Basic	18	F
45	45	Mild	3	NA	Basic	18	F
45	45	Asymptomatic	NA	NA	Basic	56	M
45	45	Mild	5	NA	Basic	38	M
45	45	Mild	3	NA	Basic	51	M
45	45	Mild	1	NA	Basic	45	M
45	45	Asymptomatic	NA	NA	Basic	81	M
45	45	Mild	1	NA	Basic	44	F
30.96	23.9	Mild	2	NA	Basic	55	F
45	45	Asymptomatic	NA	NA	Basic	59	F
45	45	Mild	1	NA	Basic	18	M
45	45	Mild	2	NA	Basic	41	F
25.57	31.68	Asymptomatic	NA	NA	Basic	53	F
45	45	Mild	3	NA	Basic	19	M
45	45	Mild	2	NA	Basic	58	M
22.98	22.97	Mild	7	NA	Basic	46	F
45	45	Mild	2	NA	Basic	17	F
45	45	Mild	5	NA	Basic	66	M
45	45	Mild	3	NA	Basic	44	M
45	45	Mild	1	NA	Basic	41	M
45	45	Asymptomatic	NA	NA	Basic	21	F
45	45	Mild	1	NA	Basic	48	M
22.31	30.6	Mild	3	NA	Basic	35	M
32.14	32.76	Mild	3	NA	Basic	45	F
45	45	Asymptomatic	NA	NA	Basic	53	M
45	45	Mild	2	NA	Basic	13	M
45	45	Mild	2	NA	Basic	35	F
45	45	Mild	4	NA	Basic	16	M
45	45	Asymptomatic	NA	NA	Basic	31	M
19.89	28.1	Mild	4	NA	Basic	37	M
45	45	Mild	1	NA	Basic	51	F
17.83	27.93	Mild	2	NA	Basic	49	M
45	45	Mild	2	NA	Basic	28	M
25.69	28.82	Mild	1	NA	Basic	42	F
45	45	Mild	1	NA	Basic	59	M
45	45	Asymptomatic	NA	NA	Basic	13	M
30.66	30.55	Mild	2	NA	Basic	25	M
45	45	Mild	2	NA	Basic	55	M
45	45	Mild	1	NA	Basic	33	M
45	45	Mild	7	NA	Basic	70	M
45	45	Asymptomatic	NA	NA	Basic	88	F
45	45	Mild	2	NA	Basic	20	M
45	45	Mild	NA	NA	Basic	79	M
45	45	Mild	NA	NA	Basic	73	M
45	45	Mild	1	NA	Basic	34	F
45	45	Mild	NA	NA	Basic	23	M
45	45	Asymptomatic	NA	NA	Basic	44	F
45	45	Mild	NA	NA	Basic	31	F
16.78	27.35	Mild	2	NA	Basic	51	F
45	45	Asymptomatic	NA	NA	Basic	60	F
25.08	31.79	Mild	NA	NA	Basic	65	M
45	45	Mild	1	NA	Basic	69	M
27.15	36.14	Mild	7	NA	Basic	20	M
45	45	Asymptomatic	NA	NA	Basic	35	M
22.36	32.84	Mild	1	NA	Basic	34	M
45	45	Asymptomatic	NA	NA	Basic	16	F
45	45	Asymptomatic	NA	NA	Basic	24	F
45	45	Asymptomatic	NA	NA	Basic	18	F
45	45	Mild	NA	NA	Basic	44	M
45	45	Asymptomatic	NA	NA	Basic	64	M
20.45	24.26	Mild	NA	NA	Basic	75	M
45	45	Mild	NA	NA	Basic	15	F
45	45	NA	NA	NA	Basic	62	F
45	45	Mild	2	NA	Basic	61	F
45	45	Asymptomatic	NA	NA	Basic	21	F
17.45	28.63	Mild	1	NA	Basic	38	M
45	45	Asymptomatic	NA	NA	Basic	22	F
45	45	Mild	2	NA	Basic	19	F
18.93	29.48	Mild	1	NA	Basic	46	M
45	45	Asymptomatic	NA	NA	Basic	43	F
45	45	NA	NA	NA	Basic	30	F
45	45	Mild	5	NA	Basic	40	M
45	45	Mild	1	NA	Basic	23	M
45	45	Mild	1	NA	Basic	46	F
45	45	Mild	2	NA	Basic	61	M
45	45	Mild	1	NA	Basic	15	F
45	45	Mild	1	NA	Basic	53	F
17.15	25.98	Mild	2	NA	Basic	56	M
45	45	Asymptomatic	NA	NA	Basic	14	M
45	45	Asymptomatic	NA	NA	Basic	26	F
45	45	Mild	NA	NA	Basic	57	M
45	45	Asymptomatic	NA	NA	Basic	28	M
45	45	Mild	4	NA	Basic	71	M
45	45	Mild	NA	NA	Basic	21	F
45	45	Mild	NA	NA	Basic	37	F
45	45	Mild	NA	NA	Basic	58	F
45	45	Mild	NA	NA	Basic	16	M
45	45	Mild	1	NA	Basic	24	M
45	45	Mild	2	NA	Basic	46	M
23.06	26.5	Mild	1	NA	Basic	32	F
45	45	Asymptomatic	NA	NA	Basic	83	M
45	45	Asymptomatic	NA	NA	Basic	66	M
45	45	Mild	NA	NA	Basic	66	F
45	45	Asymptomatic	NA	NA	Basic	62	M
45	45	Mild	3	NA	Basic	33	F
45	45	Mild	1	NA	Basic	60	M
45	45	Mild	4	NA	Basic	32	M
45	45	Mild	4	NA	Basic	23	M
45	45	Mild	2	NA	Basic	25	F
45	45	Mild	6	NA	Basic	22	F
45	45	Mild	3	NA	Basic	23	M
45	45	Mild	5	NA	Basic	23	F
45	45	Mild	3	NA	Basic	17	F
21.12	34.16	Mild	NA	NA	Basic	18	M
45	45	Mild	2	NA	Basic	52	F
18.74	24.54	Strong	1	NA	Basic	22	M
19.49	32.64	Strong	3	NA	Basic	43	M
45	45	Mild	4	NA	Basic	18	F
45	45	Mild	3	NA	Basic	24	F
45	45	Mild	1	NA	Basic	23	F
45	45	Asymptomatic	NA	NA	Basic	22	F
19.16	29.55	Mild	3	NA	Basic	52	M
45	45	Mild	2	NA	Basic	30	M
45	45	Mild	4	NA	Basic	36	F
45	45	Mild	3	NA	Basic	37	M
45	45	Mild	6	NA	Basic	29	F
45	45	Mild	1	NA	Basic	14	M
45	45	Mild	1	NA	Basic	26	F
45	45	Mild	NA	NA	Basic	51	M
45	45	Mild	21	NA	Basic	16	F
45	45	Mild	1	NA	Basic	29	M
45	45	Asymptomatic	NA	NA	Basic	75	F
45	45	NA	NA	NA	Basic	50	F
45	45	Asymptomatic	NA	NA	Basic	62	F
45	45	Asymptomatic	NA	NA	Basic	89	F
45	45	Asymptomatic	NA	NA	Basic	52	M
45	45	Asymptomatic	NA	NA	Basic	68	M
45	45	Mild	NA	NA	Basic	47	F
45	45	Asymptomatic	NA	NA	Basic	34	M
45	45	Asymptomatic	NA	NA	Basic	54	M
45	45	Mild	4	NA	Basic	51	M
45	45	Asymptomatic	NA	NA	Basic	21	F
45	45	Asymptomatic	NA	NA	Basic	20	M
45	45	Asymptomatic	NA	NA	Basic	80	F
45	45	Mild	NA	NA	Basic	33	M
45	45	Mild	4	NA	Basic	22	F
45	45	Mild	7	NA	Basic	46	M
45	45	Mild	1	NA	Basic	56	F
19.69	27.63	Mild	3	NA	Basic	19	M
45	45	Mild	8	NA	Basic	50	F
45	45	Asymptomatic	NA	NA	Basic	42	M
45	45	Mild	1	NA	Basic	45	M
45	45	Asymptomatic	NA	NA	Basic	13	F
45	45	Asymptomatic	NA	NA	Basic	47	F
45	45	Asymptomatic	NA	NA	Basic	44	M
45	45	Mild	2	NA	Basic	35	M
45	45	Mild	5	NA	Basic	28	M
45	45	Mild	2	NA	Basic	18	F
45	45	Asymptomatic	NA	NA	Basic	36	M
45	45	Asymptomatic	NA	NA	Basic	62	F
45	45	Mild	4	NA	Basic	23	M
45	45	Mild	4	NA	Basic	42	F
45	45	Mild	2	NA	Basic	41	M
45	45	Mild	4	NA	Basic	20	F
45	45	Asymptomatic	NA	NA	Basic	71	M
20.28	19.95	Mild	2	NA	Basic	30	M
45	45	Mild	NA	NA	Basic	22	M
45	45	Mild	NA	NA	Basic	49	F
45	45	Mild	7	NA	Basic	36	M
45	45	Mild	10	NA	Basic	76	F
45	45	Asymptomatic	NA	NA	Basic	40	M
45	45	Mild	4	NA	Basic	46	M
45	45	Mild	4	NA	Basic	25	M
20.9	30.92	Mild	4	NA	Basic	45	M
45	45	Mild	7	NA	Basic	28	F
45	45	Mild	2	NA	Basic	39	F
45	45	Asymptomatic	NA	NA	Basic	37	F
21.18	26.46	Mild	4	NA	Basic	39	F
45	45	Mild	4	NA	Basic	22	F
45	45	Mild	6	NA	Basic	61	F
45	45	Mild	7	NA	Basic	40	F
45	45	Asymptomatic	NA	NA	Basic	59	M
45	45	Mild	3	NA	Basic	70	F
45	45	Mild	5	NA	Basic	35	F
45	45	Mild	2	NA	Basic	42	M
45	45	Mild	2	NA	Basic	31	M
45	45	Mild	NA	NA	Basic	41	M
45	45	Mild	NA	NA	Basic	17	F
45	45	Mild	1	NA	Basic	54	F
45	45	Asymptomatic	NA	NA	Basic	58	M
45	45	Mild	NA	NA	Basic	53	M
45	45	Mild	NA	NA	Basic	65	F
45	45	Mild	NA	NA	Basic	75	F
45	45	Mild	NA	NA	Basic	27	M
45	45	Asymptomatic	NA	NA	Basic	42	F
24.39	27.4	Asymptomatic	NA	NA	Basic	49	M
45	45	Mild	1	NA	Basic	20	M
45	45	Mild	4	NA	Basic	70	F
45	45	Mild	4	NA	Basic	48	M
45	45	Mild	5	NA	Basic	41	M
45	45	Mild	4	NA	Basic	18	F
17.38	25.89	Mild	2	NA	Basic	25	F
45	45	Asymptomatic	NA	NA	Basic	65	M
25.25	29.19	Mild	5	NA	Basic	27	M
31.9	36.39	Mild	2	NA	Basic	27	F
18.59	32.82	Mild	3	NA	Basic	17	F
45	45	Asymptomatic	NA	NA	Basic	32	F
45	45	Mild	4	NA	Basic	45	M
45	45	Asymptomatic	NA	NA	Basic	55	F
45	45	Asymptomatic	NA	NA	Basic	51	M
45	45	Mild	5	NA	Basic	21	F
27.42	37.11	Mild	3	NA	Basic	19	F
45	45	Mild	2	NA	Basic	32	M
21.42	32.79	Mild	1	NA	Basic	21	M
45	45	Mild	2	NA	Basic	20	M
45	45	Mild	2	NA	Basic	41	F
45	45	Asymptomatic	NA	NA	Basic	58	M
19.27	26.68	Mild	2	NA	Basic	62	M
45	45	Mild	3	NA	Basic	24	F
18.54	30.2	Mild	1	NA	Basic	64	M
45	45	Asymptomatic	NA	NA	Basic	77	M
23.83	30.89	Asymptomatic	NA	NA	Basic	30	F
27.51	25.32	Mild	4	NA	Basic	36	M
45	45	Asymptomatic	NA	NA	Basic	50	M
45	45	Mild	NA	NA	Basic	74	F
45	45	NA	NA	NA	Basic	49	F
45	45	Asymptomatic	NA	NA	Basic	33	M
45	45	Asymptomatic	NA	NA	Basic	26	M
45	45	Asymptomatic	NA	NA	Basic	48	M
45	45	Asymptomatic	NA	NA	Basic	76	F
45	45	Mild	NA	NA	Basic	66	F
45	45	Asymptomatic	NA	NA	Basic	86	M
45	45	Mild	3	NA	Basic	26	M
45	45	Asymptomatic	NA	NA	Basic	33	F
45	45	Asymptomatic	NA	NA	Basic	44	M
45	45	Mild	4	NA	Basic	46	M
45	45	Asymptomatic	NA	NA	Basic	53	F
31.45	36.04	Mild	1	NA	Basic	37	M
45	45	Asymptomatic	NA	NA	Basic	53	M
45	45	Asymptomatic	NA	NA	Basic	49	M
45	45	Mild	2	NA	Basic	41	M
20.52	31.33	Mild	NA	NA	Basic	38	M
45	45	Asymptomatic	NA	NA	Basic	32	M
45	45	Mild	3	NA	Basic	45	F
45	45	Mild	2	NA	Basic	42	M
18.53	27.71	Mild	2	NA	Basic	61	M
24.88	31.85	Mild	5	NA	Basic	28	F
45	45	Mild	1	NA	Basic	53	M
45	45	Mild	7	NA	Basic	61	M
45	45	Mild	5	NA	Basic	54	M
45	45	Mild	2	NA	Basic	27	M
45	45	Mild	2	NA	Basic	26	F
45	45	Mild	1	NA	Basic	55	F
28.05	34.43	Mild	5	NA	Basic	34	F
23.63	31.83	Mild	5	NA	Basic	34	F
45	45	Asymptomatic	NA	NA	Basic	56	M
45	45	Asymptomatic	NA	NA	Basic	53	M
45	45	Mild	1	NA	Basic	36	F
45	45	Mild	3	NA	Basic	46	F
45	45	Asymptomatic	NA	NA	Basic	29	F
45	45	Mild	2	NA	Basic	34	M
45	45	Mild	NA	NA	Basic	30	M
45	45	Asymptomatic	NA	NA	Basic	20	M
19.5	24.62	NA	1	NA	Basic	24	F
45	45	Asymptomatic	NA	NA	Basic	24	F
45	45	Mild	3	NA	Basic	27	F
45	45	Asymptomatic	NA	NA	Basic	51	F
45	45	Mild	3	NA	Basic	42	F
45	45	Mild	2	NA	Basic	35	M
45	45	Asymptomatic	NA	NA	Basic	36	M
45	45	Mild	1	NA	Basic	15	M
45	45	Asymptomatic	NA	NA	Basic	58	F
45	45	Asymptomatic	NA	NA	Basic	49	F
45	45	Asymptomatic	NA	NA	Basic	19	F
45	45	Mild	1	NA	Basic	34	M
45	45	Mild	3	NA	Basic	39	M
45	45	Asymptomatic	NA	NA	Basic	29	M
45	45	Asymptomatic	NA	NA	Basic	56	M
45	45	Asymptomatic	NA	NA	Basic	46	M
45	45	Mild	3	NA	Basic	18	F
45	45	Mild	4	NA	Basic	15	M
45	45	Mild	1	NA	Basic	22	F
21.94	25.73	Mild	4	NA	Basic	52	M
45	45	Mild	3	NA	Basic	34	M
20.54	27.9	Mild	2	NA	Basic	37	M
45	45	NA	NA	NA	Basic	33	F
45	45	Mild	NA	NA	Basic	63	F
45	45	Mild	1	NA	Basic	66	M
45	45	Mild	2	NA	Basic	19	M
45	45	Mild	5	NA	Basic	43	F
45	45	Mild	1	NA	Basic	40	M
45	45	Mild	1	NA	Basic	30	M
45	45	Asymptomatic	NA	NA	Basic	19	M
29.6	33.39	Mild	7	NA	Basic	39	M
45	45	Mild	4	NA	Basic	33	M
45	45	Mild	4	NA	Basic	16	M
45	45	Mild	9	NA	Basic	34	M
45	45	Mild	3	NA	Basic	62	M
45	45	Mild	4	NA	Basic	14	F
45	45	Mild	3	NA	Basic	27	F
45	45	Mild	4	NA	Basic	34	F
45	45	Mild	3	NA	Basic	20	F
18.63	30.79	Mild	2	NA	Basic	18	F
45	45	Asymptomatic	NA	NA	Basic	35	M
45	45	Asymptomatic	NA	NA	Basic	49	M
45	45	Asymptomatic	NA	NA	Basic	36	M
25.18	28.7	Mild	4	NA	Basic	18	F
24.34	32.36	Mild	1	NA	Basic	15	M
45	45	Mild	2	NA	Basic	24	F
45	45	Mild	2	NA	Basic	50	F
27.59	29.74	Mild	6	NA	Basic	25	F
45	45	Mild	3	NA	Basic	26	F
45	45	Asymptomatic	NA	NA	Basic	47	M
45	45	Mild	1	NA	Basic	40	M
27.59	32.86	Mild	2	NA	Basic	28	M
45	45	Mild	2	NA	Basic	20	F
45	45	Mild	NA	NA	Basic	48	M
45	45	Mild	NA	NA	Basic	73	M
45	45	NA	NA	NA	Basic	71	F
45	45	Asymptomatic	NA	NA	Basic	68	M
45	45	Asymptomatic	NA	NA	Basic	78	M
45	45	Mild	NA	NA	Basic	72	M
45	45	Asymptomatic	NA	NA	Basic	76	M
45	45	NA	NA	NA	Basic	87	M
27.96	24.63	Mild	1	NA	Basic	21	M
45	45	Mild	2	NA	Basic	46	F
45	45	Mild	1	NA	Basic	76	F
45	45	Asymptomatic	NA	NA	Basic	98	F
45	45	Mild	NA	NA	Basic	90	M
45	45	Asymptomatic	NA	NA	Basic	89	M
45	45	Asymptomatic	NA	NA	Basic	62	M
45	45	Asymptomatic	NA	NA	Basic	90	F
45	45	Asymptomatic	NA	NA	Basic	67	F
45	45	Asymptomatic	NA	NA	Basic	87	F
45	45	NA	NA	NA	Basic	79	M
45	45	Mild	NA	NA	Basic	26	M
45	45	Mild	NA	NA	Basic	39	M
45	45	Mild	NA	NA	Basic	25	F
33.01	38.16	Mild	1	NA	Basic	34	M
30.44	32.17	Strong	NA	NA	Basic	48	M
45	45	Asymptomatic	NA	NA	Basic	37	M
45	45	Mild	14	NA	Basic	19	M
20.31	30.97	Mild	2	NA	Basic	30	F
45	45	Asymptomatic	NA	NA	Basic	44	M
28.11	35.65	NA	NA	NA	Basic	49	M
45	45	Strong	7	NA	Basic	56	M
19.74	45	Mild	NA	NA	Basic	78	M
21.09	45	Mild	2	NA	Basic	43	F
23.89	45	Mild	2	NA	Basic	30	M
25.4	23.68	Mild	4	NA	Basic	42	M
28.44	28.67	Asymptomatic	NA	NA	Basic	56	F
28.93	33	Mild	5	NA	Basic	57	M
28.96	45	Mild	3	NA	Basic	27	F
29.54	45	Strong	NA	NA	Basic	66	M
32	24.34	Mild	30	NA	Basic	68	M
33.14	45	Asymptomatic	NA	NA	Basic	62	M
34.33	45	Mild	7	NA	Basic	33	F
35	45	Asymptomatic	NA	NA	Basic	39	F
35.19	45	Mild	3	NA	Basic	15	F
35.34	45	Mild	5	NA	Basic	56	M
36.22	45	Asymptomatic	NA	NA	Basic	72	F
36.75	45	Mild	NA	NA	Basic	41	M
37.34	45	Mild	2	NA	Basic	18	M
37.37	45	Mild	2	NA	Basic	25	M
37.51	45	Mild	1	NA	Basic	24	F
38.48	45	Mild	7	NA	Basic	16	F
45	33.2	Asymptomatic	NA	NA	Basic	37	F
45	36.86	Mild	NA	NA	Basic	31	F
45	45	Mild	3	NA	Basic	26	F
45	45	Mild	2	NA	Basic	23	M
45	45	Mild	1	NA	Basic	24	M
45	45	Asymptomatic	NA	NA	Basic	18	F
45	45	Strong	3	NA	Basic	54	M
45	45	Asymptomatic	NA	NA	Basic	55	M
45	45	Asymptomatic	NA	NA	Basic	83	F
45	45	Mild	1	NA	Basic	36	F
45	45	Mild	3	NA	Basic	28	M
45	45	Asymptomatic	NA	NA	Basic	15	M
45	45	Asymptomatic	NA	NA	Basic	25	M
45	45	Mild	1	NA	Basic	40	M
45	45	Asymptomatic	NA	NA	Basic	35	M
45	45	Mild	10	NA	Basic	89	M
45	45	Mild	NA	No	Enhanced	38	F
45	45	Strong	3	Yes	Enhanced	22	F
45	45	Mild	NA	Yes	Enhanced	26	F
45	45	Mild	5	No	Enhanced	51	M
45	45	Mild	NA	No	Enhanced	23	F
45	45	Mild	3	Yes	Enhanced	43	M
45	45	Strong	NA	No	Enhanced	15	F
45	45	Mild	5	No	Enhanced	53	M
45	45	Mild	1	Yes	Enhanced	22	M
45	45	Asymptomatic	NA	Yes	Enhanced	46	F
45	45	Mild	7	No	Enhanced	22	F
45	45	Mild	3	Yes	Enhanced	52	F
45	45	Asymptomatic	NA	No	Enhanced	61	F
45	45	Strong	1	No	Enhanced	32	F
45	45	Mild	NA	Yes	Enhanced	23	F
45	45	Mild	2	No	Enhanced	46	M
45	45	Mild	4	No	Enhanced	17	M
45	45	Mild	NA	Yes	Enhanced	19	F
45	45	Mild	3	No	Enhanced	17	F
45	45	Mild	5	No	Enhanced	26	F
45	45	Asymptomatic	NA	No	Enhanced	21	M
21.11	31.37	Mild	4	No	Enhanced	26	F
45	45	Strong	3	Yes	Enhanced	23	F
27.64	35.42	Mild	4	Yes	Enhanced	23	M
45	45	Mild	NA	No	Enhanced	29	M
45	45	Strong	3	No	Enhanced	31	F
45	45	Asymptomatic	NA	Yes	Enhanced	29	M
17.44	18.26	Mild	1	Yes	Enhanced	27	F
45	45	Strong	NA	Yes	Enhanced	29	M
45	45	Asymptomatic	NA	No	Enhanced	34	M
15.97	30.44	Mild	1	Yes	Enhanced	34	F
45	45	Asymptomatic	NA	No	Enhanced	33	F
17.38	17.75	Strong	2	Yes	Enhanced	25	M
45	45	Strong	1	No	Enhanced	34	F
45	45	NA	NA	NA	Enhanced	21	F
19.59	22.84	Mild	1	No	Enhanced	19	F
45	45	Asymptomatic	NA	Yes	Enhanced	39	F
20.16	30.04	Mild	3	Yes	Enhanced	22	M
21.22	27.5	Mild	1	No	Enhanced	35	F
45	45	Mild	NA	Yes	Enhanced	64	F
45	45	Mild	NA	No	Enhanced	22	M
23.73	30.28	Mild	1	Yes	Enhanced	36	M
45	45	Mild	4	Yes	Enhanced	54	M
45	45	Mild	1	No	Enhanced	33	F
45	45	Asymptomatic	1	No	Enhanced	27	F
45	45	Mild	4	Yes	Enhanced	23	F
45	45	Mild	7	Yes	Enhanced	37	M
45	45	Mild	2	Yes	Enhanced	25	F
45	45	Mild	NA	Yes	Enhanced	25	M
45	45	Asymptomatic	NA	Yes	Enhanced	25	F
17.87	23.86	Strong	3	No	Enhanced	57	M
45	45	Asymptomatic	NA	Yes	Enhanced	33	M
45	45	Strong	1	No	Enhanced	40	M
45	45	Asymptomatic	NA	No	Enhanced	48	M
45	45	Mild	1	No	Enhanced	53	F
45	45	NA	NA	NA	Enhanced	31	M
45	45	NA	NA	Yes	Enhanced	33	F
45	45	Mild	5	No	Enhanced	17	F
20.66	29.34	Mild	2	Yes	Enhanced	21	M
45	45	Strong	1	Yes	Enhanced	38	M
45	45	Mild	NA	Yes	Enhanced	24	F
45	45	Strong	4	No	Enhanced	28	F
45	45	Strong	2	Yes	Enhanced	22	F
45	45	Mild	NA	No	Enhanced	51	F
45	45	Mild	NA	No	Enhanced	19	F
45	45	Strong	5	Yes	Enhanced	41	M
45	45	Strong	1	No	Enhanced	17	F
17.67	27.75	Strong	3	Yes	Enhanced	25	M
45	45	Mild	6	No	Enhanced	30	F
18.67	29.8	Mild	5	No	Enhanced	34	M
45	45	Mild	1	Yes	Enhanced	47	M
45	45	Mild	NA	Yes	Enhanced	35	F
45	45	Mild	NA	No	Enhanced	25	M
45	45	NA	NA	NA	Enhanced	60	M
45	45	Mild	NA	No	Enhanced	22	F
45	45	Mild	3	No	Enhanced	24	F
45	45	Mild	1	Yes	Enhanced	27	F
45	45	Mild	4	No	Enhanced	16	M
45	45	Mild	1	No	Enhanced	24	M
45	45	Mild	7	No	Enhanced	40	F
45	45	Mild	7	Yes	Enhanced	24	F
45	45	Asymptomatic	NA	No	Enhanced	26	F
45	45	Strong	NA	NA	Enhanced	21	F
45	45	Asymptomatic	NA	Yes	Enhanced	23	M
45	45	Mild	1	Yes	Enhanced	28	M
45	45	Strong	7	No	Enhanced	41	F
22.39	30.57	NA	NA	Yes	Enhanced	31	M
45	45	Asymptomatic	NA	Yes	Enhanced	29	F
34.28	37.64	Mild	NA	Yes	Enhanced	32	M
45	45	Mild	3	No	Enhanced	23	M
18.15	25.69	Strong	1	No	Enhanced	30	M
45	45	Asymptomatic	NA	Yes	Enhanced	27	F
45	45	Mild	1	No	Enhanced	28	F
45	45	Strong	7	No	Enhanced	28	F
45	45	Mild	1	No	Enhanced	35	M
45	45	Strong	4	Yes	Enhanced	29	F
45	45	Mild	3	No	Enhanced	27	F
45	45	Mild	2	No	Enhanced	39	M
45	45	Asymptomatic	NA	Yes	Enhanced	28	F
45	45	Mild	2	No	Enhanced	40	M
45	45	Strong	2	Yes	Enhanced	17	M
45	45	Mild	NA	No	Enhanced	22	F
45	45	Mild	3	No	Enhanced	34	F
45	45	Mild	3	No	Enhanced	22	M
45	45	Asymptomatic	NA	No	Enhanced	27	M
45	45	Strong	2	Yes	Enhanced	28	M
21.62	27.97	Strong	2	No	Enhanced	18	F
45	45	Asymptomatic	NA	Yes	Enhanced	53	F
45	45	Asymptomatic	NA	No	Enhanced	47	M
45	45	Asymptomatic	NA	No	Enhanced	36	F
45	45	Asymptomatic	NA	Yes	Enhanced	54	M
28.26	30.36	Mild	10	No	Enhanced	23	F
45	45	Strong	1	No	Enhanced	32	F
45	45	Asymptomatic	NA	Yes	Enhanced	73	F
45	45	Mild	4	Yes	Enhanced	23	M
45	45	Asymptomatic	NA	No	Enhanced	27	F
45	45	Strong	NA	No	Enhanced	18	F
45	45	Strong	1	No	Enhanced	26	M
45	45	Strong	5	Yes	Enhanced	64	F
45	45	Asymptomatic	NA	No	Enhanced	36	M
45	45	Asymptomatic	NA	Yes	Enhanced	29	M
45	45	Asymptomatic	NA	Yes	Enhanced	23	F
45	45	Mild	2	No	Enhanced	25	M
45	45	Strong	2	Yes	Enhanced	60	M
29.82	35.05	Mild	2	No	Enhanced	21	F
45	45	Mild	NA	No	Enhanced	31	M
45	45	Strong	2	No	Enhanced	35	F
45	45	Mild	3	No	Enhanced	42	M
45	45	Asymptomatic	NA	No	Enhanced	39	M
24.35	33.34	Mild	NA	No	Enhanced	32	F
45	45	Mild	7	No	Enhanced	35	M
45	45	Strong	14	Yes	Enhanced	21	M
18.41	27.9	Strong	1	No	Enhanced	39	M
45	45	Mild	14	No	Enhanced	61	F
18.05	26.75	Strong	1	Yes	Enhanced	25	M
45	45	Mild	5	Yes	Enhanced	22	M
45	45	Mild	NA	No	Enhanced	17	M
45	45	Mild	1	No	Enhanced	21	F
20.65	32.03	Mild	4	NA	Enhanced	30	F
45	45	NA	NA	NA	Enhanced	38	F
45	45	NA	NA	NA	Enhanced	25	M
45	45	NA	NA	NA	Enhanced	39	M
45	45	NA	NA	NA	Enhanced	36	M
45	45	Mild	4	NA	Enhanced	53	M
45	45	Mild	2	NA	Enhanced	23	M
45	45	Mild	5	No	Enhanced	42	F
45	45	NA	NA	NA	Enhanced	54	M
45	45	Mild	1	Yes	Enhanced	19	M
35.93	45	Mild	3	Yes	Enhanced	25	F
45	45	Mild	2	No	Enhanced	42	F
38.71	35.38	Mild	4	NA	Enhanced	26	M
45	45	Mild	4	NA	Enhanced	38	M
21.58	24.18	Strong	2	NA	Enhanced	20	F
45	45	Mild	1	NA	Enhanced	30	M
24.22	31.41	Mild	3	NA	Enhanced	65	M
45	45	NA	NA	NA	Enhanced	40	F
37.31	34.08	Mild	3	NA	Enhanced	39	F
45	45	Mild	2	Yes	Enhanced	30	M
21.31	28.25	Mild	3	No	Enhanced	23	M
45	45	Mild	1	NA	Enhanced	44	M
45	45	Asymptomatic	NA	NA	Enhanced	66	F
45	45	Mild	NA	Yes	Enhanced	32	M
45	45	Mild	4	NA	Enhanced	30	F
45	45	Mild	5	NA	Enhanced	30	F
45	45	Mild	1	NA	Enhanced	21	F
45	45	NA	NA	NA	Enhanced	29	M
45	45	Strong	3	NA	Enhanced	39	M
45	45	Mild	2	NA	Enhanced	53	F
45	45	Mild	NA	Yes	Enhanced	36	M
21.67	24.18	Mild	1	NA	Enhanced	42	F
45	45	Mild	3	NA	Enhanced	14	F
45	45	Asymptomatic	NA	NA	Enhanced	41	F
45	45	Asymptomatic	NA	NA	Enhanced	63	M
45	45	Strong	2	NA	Enhanced	38	M
45	45	Mild	2	NA	Enhanced	54	F
45	45	Mild	2	NA	Enhanced	39	M
45	45	Mild	2	NA	Enhanced	31	M
24.77	36.64	Strong	4	NA	Enhanced	55	M
45	45	Strong	2	NA	Enhanced	30	M
45	45	Mild	3	NA	Enhanced	13	F
45	45	Mild	4	NA	Enhanced	19	F
45	45	Asymptomatic	2	NA	Enhanced	24	M
45	45	Mild	4	NA	Enhanced	39	M
45	45	Mild	2	NA	Enhanced	39	M
45	45	NA	NA	NA	Enhanced	44	F
45	45	Mild	3	NA	Enhanced	55	F
45	45	Mild	3	NA	Enhanced	18	M
35.37	33.75	Mild	2	NA	Enhanced	49	M
33.31	45	Mild	NA	Yes	Enhanced	25	M
34.94	45	Mild	26	No	Enhanced	46	M
45	27.75	NA	1	Yes	Enhanced	51	F
35.93	45	Mild	3	Yes	Enhanced	25	F
45	45	Mild	10	Yes	Enhanced	32	M
45	45	Mild	2	Yes	Enhanced	21	M
45	45	Mild	1	Yes	Enhanced	29	F
45	45	Strong	1	Yes	Enhanced	7	M
45	45	Mild	NA	Yes	Enhanced	12	M
45	45	Mild	NA	Yes	Enhanced	9	M
45	45	Strong	2	Yes	Enhanced	7	F
45	45	Strong	1	Yes	Enhanced	7	F
45	45	Mild	2	Yes	Enhanced	9	M
45	45	Mild	1	Yes	Enhanced	6	F
45	45	Strong	8	Yes	Enhanced	5	M
21.55	22.64	Mild	1	NA	Enhanced	14	M
45	45	Strong	2	Yes	Enhanced	10	F
45	45	Mild	1	Yes	Enhanced	7	F
45	45	Asymptomatic	NA	Yes	Enhanced	17	M
45	45	Mild	2	Yes	Enhanced	7	M
45	45	Mild	1	Yes	Enhanced	5	M
45	45	Mild	NA	Yes	Enhanced	13	M
45	33.9	Mild	2	No	Enhanced	6	M
45	45	Mild	3	Yes	Enhanced	16	M
45	45	Asymptomatic	NA	Yes	Enhanced	14	F
26.61	20.82	Mild	4	Yes	Enhanced	13	M
45	45	Mild	6	Yes	Enhanced	10	F
45	45	Mild	12		Enhanced	14	M
27.47	33.02	Mild		Yes	Enhanced	10	F
45	45	Mild	3	Yes	Enhanced	8	M
45	31.44	Mild	3	Yes	Enhanced	15	M
45	45	Mild	1		Enhanced	9	F
45	45	Mild	7	Yes	Enhanced	14	M
45	45	Mild	3	Yes	Enhanced	6	M
45	45	Mild	4	Yes	Enhanced	9	F
45	45	Mild	7	Yes	Enhanced	9	M
45	45	Strong	14	Yes	Enhanced	14	M
45	45	Mild		Yes	Enhanced	11	M
45	45	Mild	1	Yes	Enhanced	12	M
45	45	Mild		Yes	Enhanced	6	F
45	45	Mild	2		Enhanced	9	M
22	30.12	Mild	4	Yes	Enhanced	15	M
45	45	Mild	1	No	Enhanced	15	F
45	45	Mild	1	Yes	Enhanced	6	M
45	45	Mild	2	No	Enhanced	8	M
18.05	31.49	Mild	2	Yes	Enhanced	11	F
45	45	Mild	2	Yes	Enhanced	13	F
45	45	Mild		Yes	Enhanced	12	M
17.85	28.98	Mild	1	No	Enhanced	13	M
17.72	25.52	Mild	1	Yes	Enhanced	14	F
27.23	25.34	Mild	2	Yes	Enhanced	10	F
45	45	Mild	5	Yes	Enhanced	6	M
24.97	28.91	Mild		Yes	Enhanced	11	M
45	45	Mild	2	Yes	Enhanced	13	M
45	45	Mild	4	No	Enhanced	9	F
45	45	Mild	2	Yes	Enhanced	12	M
45	45	Mild	2	Yes	Enhanced	11	F
45	45	Mild	3	Yes	Enhanced	10	F
18.33	30.41	Mild	4	Yes	Enhanced	19	M
45	45	Mild	2	yes	Enhanced	13	F
45	45	Mild	2	Yes	Enhanced	10	M
45	31.43	Mild	2	Yes	Enhanced	9	M
22.37	30.28	Mild	1	Yes	Enhanced	7	F
45	45		1	Yes	Enhanced	8	F
45	45	Mild		Yes	Enhanced	16	F
45	45	Mild	2	Yes	Enhanced	13	F
45	45	Mild	3	Yes	Enhanced	11	M
45	45	Mild	3	Yes	Enhanced	11	M
45	45	Mild	3	Yes	Enhanced	12	M
31.68	28.91	Asymptomatic		Yes	Enhanced	11	F
45	45	Asymptomatic		Yes	Enhanced	14	M
45	45	Mild	2	No	Enhanced	19	F
45	45	Mild	1	No	Enhanced	12	M
45	45	Mild	1	Yes	Enhanced	12	M
45	33.95	Mild	1	Yes	Enhanced	11	M
45	45	Mild	3	No	Enhanced	7	M
45	45	Mild	2	No	Enhanced	10	F
45	45	Mild	1	No	Enhanced	10	F
45	45	Mild	7	Yes	Enhanced	5	F
27.33	25.55	Mild		Yes	Enhanced	11	F
45	45	Mild	2	Yes	Enhanced	10	M
45	45	Mild	2	yes	Enhanced	6	M
45	45	Strong	3	Yes	Enhanced	16	F
45	45	Asymptomatic		Yes	Enhanced	7	F
45	45	Mild	1	Yes	Enhanced	11	F
17.28	27.53	Mild	1	No	Enhanced	14	M
45	45	Asymptomatic		Yes	Enhanced	16	F
45	45	Mild	1	Yes	Enhanced	10	M
45	45	Mild		Yes	Enhanced	16	F
20.06	29.99	Mild		Yes	Enhanced	5	M
23.38	33.96	Mild		Yes	Enhanced	5	M
45	45	Asymptomatic		No	Enhanced	6	F
45	45	Asymptomatic		Yes	Enhanced	8	F
45	45	Mild	3	Yes	Enhanced	14	M
45	45	Mild	1	No	Enhanced	7	F
45	45	Mild	1	Yes	Enhanced	10	M
45	45	Mild	1	Yes	Enhanced	8	F
45	37.55	Mild	1	Yes	Enhanced	6	F
30.85	35.11	Mild	3	No	Enhanced	6	F
45	45	Mild	7	Yes	Enhanced	12	F
20.67	19.59	Mild	2	Yes	Enhanced	8	F
45	45	Asymptomatic		Yes	Enhanced	10	M
27.75	31.88	Mild	2	Yes	Enhanced	12	M
45	45	Asymptomatic		Yes	Enhanced	12	M
45	45	Mild	1	Yes	Enhanced	12	M
45	45	Mild		No	Enhanced	13	F
45	45	Mild	1	Yes	Enhanced	11	F
45	45	Mild	3	Yes	Enhanced	12	M
45	45	Mild	2	No	Enhanced	9	F
45	45	Mild	1	No	Enhanced	35	F
45	45	Mild	2	Yes	Enhanced	28	M
20.11	27.7	Mild	1	Yes	Enhanced	28	M
45	45	Mild	1	No	Enhanced	17	M
45	45	Asymptomatic	NA	No	Enhanced	22	F
36.62	33.54	Mild	3	Yes	Enhanced	16	F
45	45	Strong	3	Yes	Enhanced	40	M
45	45	Strong	2	No	Enhanced	35	F
26.6	32.88	Mild	6	No	Enhanced	57	F
17.98	35.81	Strong	2	No	Enhanced	49	M
19.04	33.06	Mild	1	Yes	Enhanced	25	M
45	45	Mild	4	No	Enhanced	36	M
45	45	Mild	1	No	Enhanced	28	M
29.41	31.47	Mild	9	Yes	Enhanced	24	M
45	45	Asymptomatic	NA	Yes	Enhanced	20	M
45	45	Asymptomatic	NA	Yes	Enhanced	29	M
23.76	28.7	Mild	2	No	Enhanced	58	M
45	45	Asymptomatic	NA	No	Enhanced	29	M
45	45	Strong	3	Yes	Enhanced	22	M
45	45	Asymptomatic	NA	No	Enhanced	33	F
25.99	35.07	Mild	2	Yes	Enhanced	30	F
45	45	Mild	3	No	Enhanced	23	M
45	45	Mild	1	Yes	Enhanced	43	F
16.64	25.58	Mild	1	No	Enhanced	53	M
45	45	Strong	3	No	Enhanced	40	M
36.42	35.17	Mild	4	Yes	Enhanced	63	M
45	45	Asymptomatic	NA	No	Enhanced	33	F
24.53	21.94	Strong	1	Yes	Enhanced	54	M
45	45	Strong	1	No	Enhanced	36	M
45	45	Strong	5	Yes	Enhanced	17	F
45	45	Asymptomatic	NA	Yes	Enhanced	76	M
45	45	Strong	2	Yes	Enhanced	34	M
45	45	Mild	1	No	Enhanced	46	M
45	45	Mild	1	No	Enhanced	71	F
23.54	30.81	Mild	7	Yes	Enhanced	34	F
45	45	Asymptomatic	NA	No	Enhanced	18	F
45	45	Mild	1	No	Enhanced	63	F
45	45	Asymptomatic	NA	Yes	Enhanced	49	F
45	45	Mild	3	No	Enhanced	31	F
24.24	22.13	Strong	1	No	Enhanced	35	F
21.95	17.65	Mild	1	Yes	Enhanced	40	M
45	45	Asymptomatic	NA	No	Enhanced	24	F
45	45	Strong	2	No	Enhanced	30	M
45	45	Mild	4	No	Enhanced	24	F
45	45	Mild	5	Yes	Enhanced	27	M
45	45	Strong	3	No	Enhanced	36	F
45	45	Mild	NA	Yes	Enhanced	53	F
45	45	Mild	3	Yes	Enhanced	32	F
45	45	Mild	6	No	Enhanced	32	F
45	45	Mild	NA	No	Enhanced	51	F
45	45	Mild	1	NA	Enhanced	46	F
45	45	Mild	2	No	Enhanced	26	F
45	45	Mild	4	No	Enhanced	24	F
45	45	Mild	1	No	Enhanced	21	F
45	45	Mild	NA	Yes	Enhanced	43	M
45	45	Mild	1	No	Enhanced	26	M
45	45	Mild	3	No	Enhanced	34	M
45	45	Mild	2	No	Enhanced	26	M
29.26	33.81	Mild	NA	No	Enhanced	36	M
45	45	Strong	1	No	Enhanced	16	F
45	45	Mild	1	Yes	Enhanced	28	M
45	45	Mild	3	Yes	Enhanced	34	M
45	45	Mild	4	No	Enhanced	40	F
45	45	Mild	3	No	Enhanced	17	M
45	45	Mild	1	No	Enhanced	42	M
45	45	Mild	2	Yes	Enhanced	63	M
25.9	30.41	Strong	4	No	Enhanced	37	F
45	45	Mild	3	No	Enhanced	27	F
45	45	Mild	4	No	Enhanced	35	M
20.7	27.98	Mild	4	No	Enhanced	41	M
45	45	Strong	5	No	Enhanced	40	F
45	45	Mild	3	Yes	Enhanced	28	F
45	45	Strong	2	No	Enhanced	36	F
45	45	NA	NA	No	Enhanced	58	M
45	45	Asymptomatic	NA	Yes	Enhanced	34	M
27.18	31.86	Asymptomatic	NA	Yes	Enhanced	17	M
45	45	Strong	2	No	Enhanced	26	M
45	45	Mild	1	No	Enhanced	22	M
45	45	Mild	3	No	Enhanced	33	M
45	45	Mild	5	Yes	Enhanced	24	F
45	45	Mild	1	No	Enhanced	22	M
45	45	Mild	3	No	Enhanced	25	M
45	45	Asymptomatic	NA	No	Enhanced	22	F
45	45	Mild	3	Yes	Enhanced	31	M
45	45	Mild	1	No	Enhanced	22	F
45	45	Asymptomatic	NA	No	Enhanced	61	M
20.02	22.54	Mild	5	No	Enhanced	76	M
24.29	33.69	Mild	3	Yes	Enhanced	32	F
45	45	Asymptomatic	NA	No	Enhanced	37	F
45	45	Asymptomatic	NA	Yes	Enhanced	53	F
45	45	Asymptomatic	NA	Yes	Enhanced	28	F
45	45	Mild	NA	Yes	Enhanced	39	M
45	45	Strong	3	No	Enhanced	53	M
45	45	Mild	NA	NA	Enhanced	71	M
45	45	Mild	1	No	Enhanced	21	F
17.76	28.5	Strong	2	Yes	Enhanced	28	F
45	45	Mild	NA	No	Enhanced	21	F
45	45	Mild	1	NA	Enhanced	20	M
45	45	Asymptomatic	NA	Yes	Enhanced	32	F
28.06	29.81	Mild	7	Yes	Enhanced	40	M
45	45	Asymptomatic	NA	No	Enhanced	34	M
45	45	Strong	NA	No	Enhanced	21	F
45	45	Strong	2	Yes	Enhanced	27	M
45	45	Mild	2	No	Enhanced	34	F
45	45	Mild	3	Yes	Enhanced	39	M
45	45	Asymptomatic	NA	No	Enhanced	31	M
45	45	Mild	1	Yes	Enhanced	32	M
45	45	Mild	NA	No	Enhanced	19	M
27.96	31.33	Mild	5	Yes	Enhanced	23	M
45	45	Mild	3	No	Enhanced	31	F
45	45	Mild	3	Yes	Enhanced	26	F
45	45	Mild	2	Yes	Enhanced	38	F
23.54	29.32	Asymptomatic	NA	No	Enhanced	47	M
45	45	Mild	1	Yes	Enhanced	23	F
45	45	Asymptomatic	NA	No	Enhanced	36	M
38.06	18.63	Asymptomatic	NA	Yes	Enhanced	32	M
45	45	Mild	7	No	Enhanced	16	F
45	45	Mild	2	No	Enhanced	26	M
45	45	Mild	2	Yes	Enhanced	30	M
45	45	Asymptomatic	NA	No	Enhanced	35	F
45	45	Mild	3	Yes	Enhanced	49	M
45	45	Mild	3	No	Enhanced	24	M
45	45	Asymptomatic	NA	Yes	Enhanced	18	M
45	45	Strong	NA	No	Enhanced	57	M
45	45	Asymptomatic	NA	No	Enhanced	16	M
35.28	26.66	Mild	NA	No	Enhanced	18	F
45	45	Strong	2	Yes	Enhanced	47	M
45	45	Strong	2	Yes	Enhanced	54	F
45	45	Mild	3	No	Enhanced	21	F
45	45	Mild	1	No	Enhanced	28	F
45	45	Mild	NA	No	Enhanced	28	F
45	45	Mild	1	No	Enhanced	39	F
45	45	Asymptomatic	NA	Yes	Enhanced	30	M
19.88	31.94	Strong	1	No	Enhanced	29	M
45	45	Mild	NA	No	Enhanced	38	M
45	45	Mild	7	No	Enhanced	38	F
45	45	Mild	2	NA	Enhanced	43	F
18.41	19.83	Mild	1	Yes	Enhanced	23	F
